# Supplementary material
Source: PubMed Central journal article supplement (PMC3916878)

## SUPPLEMENTARY FIGURES

**Supplementary Table 1.** Antibodies used for flow cytometry.

| Protein | Fluorochrome | Clone  | Isotype                  | Supplier   |
|---------|--------------|--------|--------------------------|------------|
| CCR7    | PE-Cy7       | G043H7 | Ms IgG <sub>2a</sub> , κ | Biolegend  |
| CD1c    | PeCy7        | L161   | Ms IgG <sub>1,κ</sub>    | BioLegend  |
| CD3     | FITC         | SK7    | Ms IgG <sub>1,κ</sub>    | BD         |
| CD3     | PE           | SK7    | Ms IgG <sub>1, κ</sub>   | BD         |
| CD3     | V500         | UCHT1  | Ms IgG <sub>1, κ</sub>   | BD         |
| CD4     | FITC         | SK3    | Ms IgG <sub>1, κ</sub>   | BD         |
| CD4     | PE-Cy7       | SK3    | Ms IgG <sub>1, κ</sub>   | BD         |
| CD4     | PE           | SK3    | Ms IgG <sub>1, κ</sub>   | BD         |
| CD8     | APC          | SK1    | Ms IgG <sub>1, κ</sub>   | BD         |
| CD8     | APC-Cy7      | SK1    | Ms IgG <sub>1, κ</sub>   | BD         |
| CD11c   | V450         | B-Ly6  | Ms IgG <sub>1,κ</sub>    | BD         |
| CD14    | BV650        | M5E2   | Ms IgG <sub>2a</sub> , κ | BioLegend  |
| CD16    | APC-H7       | 3G8    | Ms IgG <sub>1,κ</sub>    | BD         |
| CD19    | FITC         | 4G7    | Ms IgG <sub>1,κ</sub>    | BD         |
| CD20    | FITC         | L27    | Ms IgG <sub>1,κ</sub>    | BD         |
| CD25    | APC-Cy7      | M-A251 | Ms IgG <sub>1,κ</sub>    | BD         |
| CD27    | BV421        | O323   | Ms IgG <sub>1,κ</sub>    | Biolegend  |
| CD34    | PE           | 8G12   | Ms IgG <sub>1,κ</sub>    | BD         |
| CD38    | PE-Cy7       | HB7    | Ms IgG <sub>1,κ</sub>    | BD         |
| CD45RA  | APC-Cy7      | HI100  | Ms IgG <sub>2b</sub> , κ | Biolegend  |
| CD45RA  | Q605         | MEM-56 | Ms IgG <sub>2b</sub> , κ | Invitrogen |

|               |            |           |                          |           |
|---------------|------------|-----------|--------------------------|-----------|
| CD56          | FITC       | NCAM16.2  | Ms IgG <sub>2b</sub> , κ | BD        |
| CD56          | BV421      | HCD56     | Ms IgG <sub>1</sub> , κ  | Biolegend |
| CD56          | PERCPCy5.5 | HCD56     | Ms IgG <sub>2a</sub> , κ | Biolegend |
| CD56          | PERCPCy5.5 | MEM-188   | Ms IgG <sub>2a</sub> , κ | Biolegend |
| CD62L         | PE-Cy7     | DREG-56   | Ms IgG <sub>1</sub> , κ  | Biolegend |
| CD123         | PERCPCy5.5 | 7G3       | Ms IgG <sub>2a</sub> , κ | BD        |
| CD127         | APC        | A019D5    | Ms IgG <sub>1</sub>      | Biolegend |
| CD141         | APC        | AD5-14H12 | Ms IgG1                  | Miltenyi  |
| CD158e1/e2    | PE         | Z27.3.7   | Ms IgG <sub>1</sub>      | Beckman C |
| CD158a,h      | PE         | EB6.B     | Ms IgG <sub>1</sub>      | Beckman C |
| CD158 b1/b2,j | PE         | GL183     | Ms IgG <sub>1</sub>      | Beckman C |
| CD161         | BV421      | HP-3G10   | Ms IgG <sub>1</sub> , κ  | Biolegend |
| HLA-DR        | V500       | L243      | Ms IgG <sub>2a</sub> , κ | BD        |
| HLA-DR        | A700       | G46-6     | Ms IgG <sub>2b</sub> , κ | BD        |
| NKG2A         | APC        | Z199      | Ms IgG <sub>2b</sub> , κ | Beckman C |
| NKG2C         | PerCP      | 134591    | Ms IgG <sub>1</sub> , κ  | R&D       |
| TCRVα24Ja18   | PE         | 6B11      | Ms IgG <sub>1</sub> , κ  | Biolegend |
| TCRγδ         | FITC       | B1        | Ms IgG <sub>1</sub> , κ  | BD        |
| TCRVα7.2      | APC        | 3C10      | Ms IgG <sub>1</sub> , κ  | Biolegend |

**Supplementary Figure 1. Distribution of GATA2 mutation**

Summary of distribution of GATA2 mutations in the cohort. ZF1 and ZF2 indicate the two zinc finger regions. Superscript numerals indicate the more than one pedigree with the same mutation.

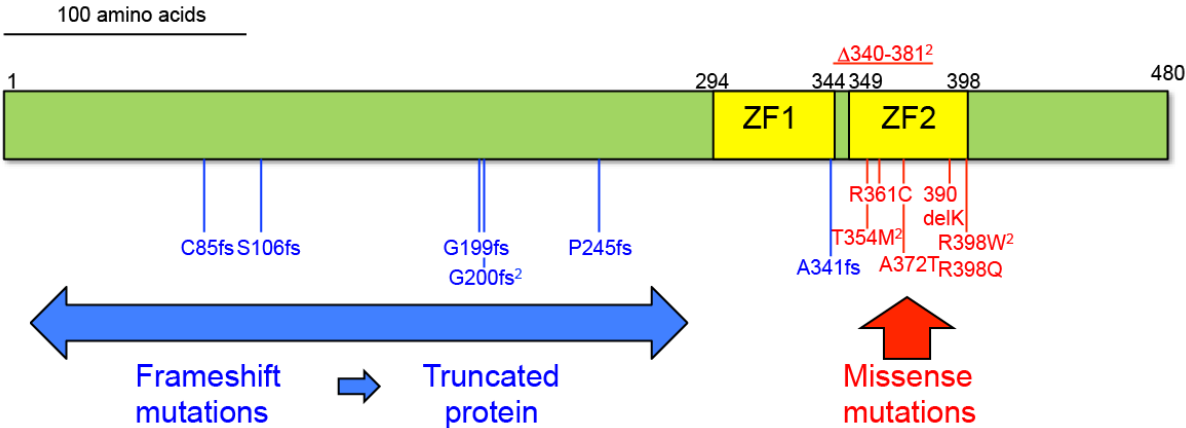

## Supplementary Figure 2. Effect of *GATA2* knock-down on human progenitors.

Short hairpin RNA (shRNA) lentiviral vectors were constructed to knock-down *GATA2* to 50% or less in the HSC compartment in an attempt to recapitulate the effect of a *GATA2* heterozygous phenotype. The best of six shRNAs tested was used for subsequent experiments:

Forward:CCGGTGTGCAAATTGTCAGACGACAACCTCGAGTTGTCGTCTGACAATTTG  
CACTTTTTG

Reverse:AATTCAAAAAGTGCAAATTGTCAGACGACAACCTCGAGTTGTCGTCTGACA  
ATTTGCACA

Lineage-negative (Lin-) CD34+CD38- cord blood (CB) cells from 2 independent pools of CB were transduced with lentiviral constructs expressing *GATA2*-short hairpin RNA (shRNA) or LacZ-shRNA. After 48h, Lin-CD34+CD38-CD90+ GFP+ or BFP+ hematopoietic stem cells (HSC) were sorted and equal number of *GATA2*-shRNA induced and control cells transplanted into the right femur of mice irradiated with 225 rads 24 h beforehand. Cells were harvested after 8 weeks and analyzed for surface markers by flow cytometry. The development of CD19+ B cells, CD33+ myeloid cells, common myeloid progenitors (CD34+CD38+CD45RA-CD135+) and MLP (CD34+CD38-CD45RA+) to compare the competitive performance of HSC transduced by *GATA2* shRNA compared with control LacZ shRNA.

A: Efficiency of *GATA2* knock-down in primary lineage-negative cord blood cells. RNA was prepared from sorted GFP+ progenitor cells and relative *GATA2* expression measured by RT-PCR. LacZ: LacZ control; G2shRNA: *GATA2* short hairpin RNA. B: The frequency of progenitors in competitive repopulation assays with *GATA2* short hairpin RNA transduced human cord blood HSC compared with control LacZ transduced HSC after 8 weeks xenografting in NSG mice. Left: myeloid progenitors (CD34+CD38+CD135+CD45RA-) and right: multilymphoid progenitors (CD34+CD38-CD45RA+). LG: LacZ-shRNA GFP; LB: LacZ-shRNA BFP; G2G: *GATA2*-shRNA GFP. C: Representative flow cytometry plots of xenografts in NSG mice bearing LacZ-shRNA BFP or *GATA2*-shRNA GFP transfected HSC showing CD19+ B cells, CD33+ myeloid cells and the primitive CD34+CD38- progenitor compartment. There was no significant effect of *GATA2* knock-down in the generation of hematopoietic progenitors or balance of lymphoid/myeloid output.

## Supplementary Figure 2

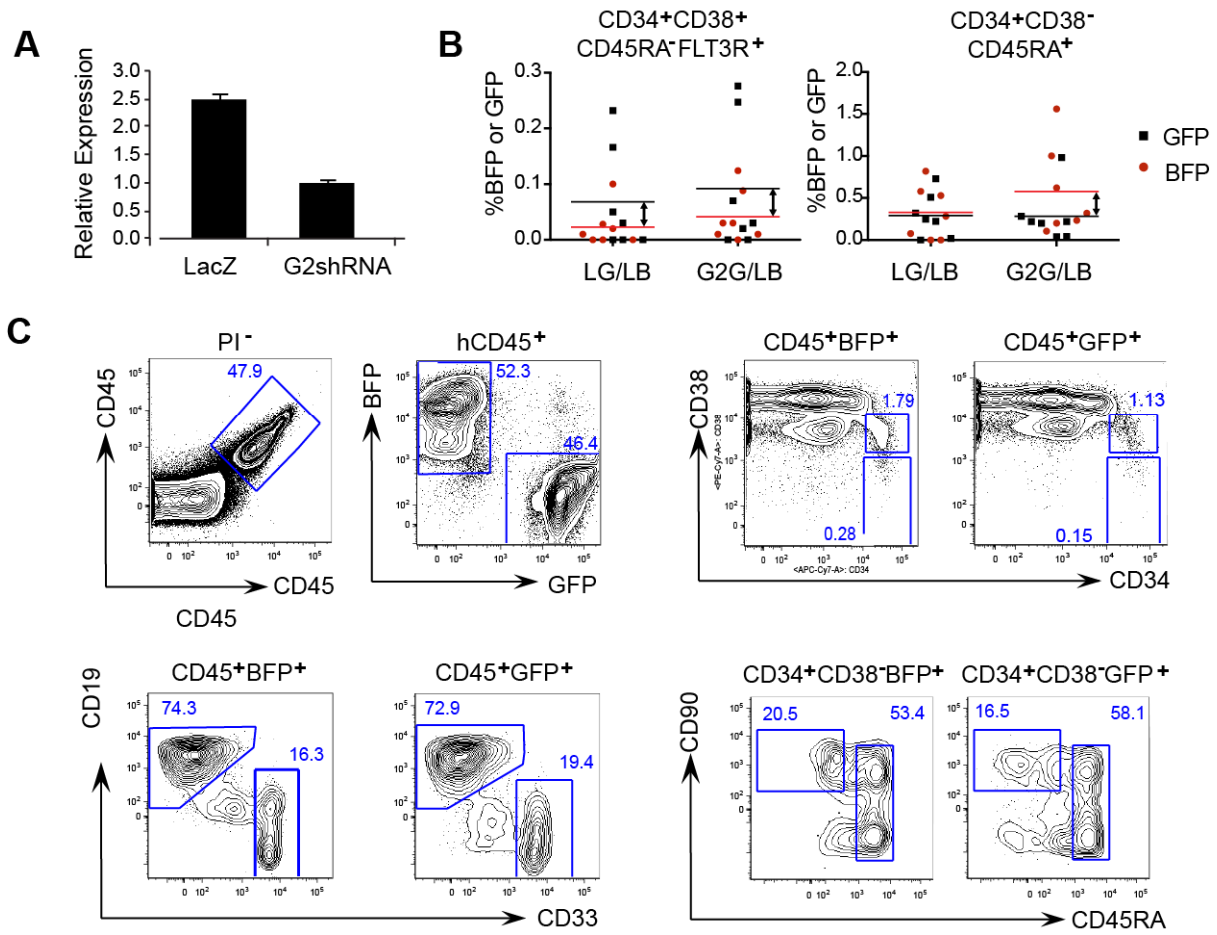

### Supplementary Figure 3. Other biomarkers of GATA2 mutation

Comparison of stromal growth factors EGF and FGF-2 and serum GM-CSF and CD40L in controls, GATA2 mutation and MDS. Data shown were derived independently of the multiplex screening assay, using a dedicated ELISA for each marker and a larger collection of serum from GATA2 patients \*  $P < 0.05$ ; \*\*  $P < 0.01$ .

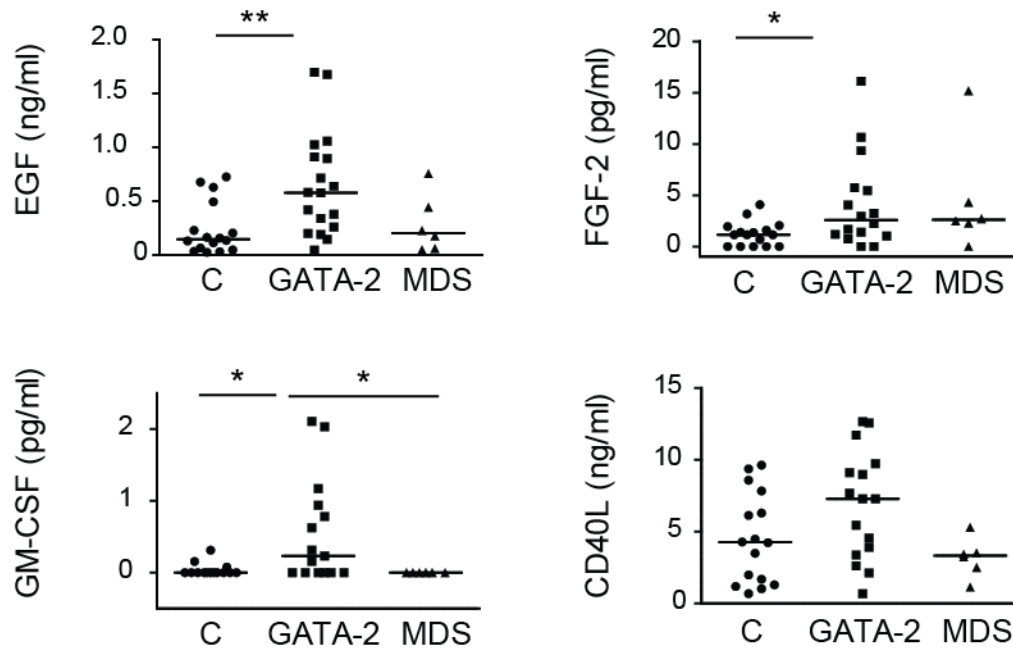

Supplement: supp_blood-2013-07-517151_blood-2013-07-517151-1.pdf [file supp_blood-2013-07-517151_blood-2013-07-517151-1.pdf]
